# Supplementary material
Source: PubMed Central journal article supplement (PMC4403793)

**SUPPLEMENTARY FIGURE LEGENDS****Figure S1. Pvf1 and Pvr function in non-overlapping zones and loss of Pvr does not cause cell death**

All lymph glands shown are from wandering third instar larvae, except panel **A-F** where they are second instar.

**(A-F)** Cell proliferation profile in lymph glands from mid-second instar larvae analyzed by BrdU (red) incorporation during S phase. These panels are identical to those shown in **Figure 1B-G** except for the fact that the green channel is shown here to emphasize that the BrdU incorporating cells do not express the differentiation marker Hml (green). **(A)** Control lymph glands (genotype: *Hml-gal4 UAS-2xEGFP*) at this stage have only a few proliferating cells (9 +/- 6 cells, n=6). **(B)** Induction of cell death in the differentiating blood cells by expression of Hid and Reaper (*Hml-gal4 UAS-2xEGFP UAS-hid UAS-rpr*) causes an increase in the number of BrdU positive cells (red), indicative of the loss of quiescence among the progenitors (compare with **A**). A similar loss of quiescence occurs upon either **(C)** down-regulation of Pvf1 in the PSC using *Pvf1<sup>RNAi</sup>* (*Antp-gal4 UAS-2xEGFP UAS-Pvf1<sup>RNAi</sup>*), **(D)** down-regulation of Pvr in the differentiating cells using *Pvr<sup>RNAi</sup>* (*Hml-gal4 UAS-2xEGFP UAS-Pvr<sup>RNAi</sup>*; 39 +/- 7 cells, n=5, p<0.004 when compared with **A**), or **(E)** down-regulation of Adgf-A in the differentiating cells using *Adgf-A<sup>RNAi</sup>* (*Hml-gal4 UAS-2xEGFP UAS-Adgf-A<sup>RNAi</sup>*). **(F)** Over-expression of *Adgf-A*

can suppress the proliferation phenotype due to loss of *Pvr*<sup>RNAi</sup> (*Hml-gal4 UAS-2xEGFP UAS-Pvr*<sup>RNAi</sup> *UAS-Adgf-A*; 17 +/- 7 cells, n=8, p<0.03 when compared with **D**).

**(G-J)** Down-regulation of *Pvfl* in **(H)** the MZ (*dome-gal4 UAS-2xEGFP UAS-Pvfl*<sup>RNAi</sup>) or **(I)** the CZ (*Hml-gal4 UAS-2xEGFP UAS-Pvfl*<sup>RNAi</sup>) or **(J)** down-regulation of *Pvr* in the MZ (*dome-gal4 UAS-2xEGFP UAS-Pvr*<sup>RNAi</sup>) does not cause loss of MZ progenitors.

**(K-N')** Cell death assay by TUNEL staining (red in **K-N**) and differentiation marker Hml (green in **K'-N'**). The lymph glands shown in **K-N** are the same as the corresponding ones in **K'-N'**. **(K-K')** Control (*Hml-gal4 UAS-2xEGFP*). **(L-L')** As a positive control, over-expression of Hid and Reaper (*Hml-gal4 UAS-2xEGFP UAS-hid, UAS-rpr*) promotes cell death (red). **(M-M')** Down-regulation of *Pvr* in the CZ (*Hml-gal4 UAS-2xEGFP UAS-Pvr*<sup>RNAi</sup>) does not promote cell death. **(N-N')** Down-regulation of *Adgf-A* in the CZ (*Hml-gal4 UAS-2xEGFP UAS-ADGF-A*<sup>RNAi</sup>) does not promote cell death.

**(O-P)** Over-expression of the anti-apoptotic protein *p35* does not rescue the loss of MZ from down-regulation of *Pvr* in the CZ (*Hml-gal4 UAS-2xEGFP UAS-Pvr*<sup>RNAi</sup> *UAS-p35*). The lymph gland shows expansion of differentiated cells expressing the Hml marker (green).

## **Figure S2. Expression and function of Pvf2**

In **C-D**, differentiating cells are shown in red. In **E-J**, progenitors are marked with *dome-gal4 UAS-2xEGFP* (green). This figure shows that unlike the Pvf1/Pvr interaction in the CZ, which leads to the CZ signal, Pvf2 interacts with Pvr in the MZ to control E-cadherin expression necessary for maintaining the integrity and compactness of the MZ.

**(A)** Pvf2 (red) is strongly expressed in the PSC (yellow) and the medullary zone (within the white dotted area) of the mid 2<sup>nd</sup> instar larvae (*Antp-gal4 UAS-2xEGFP Pvf2-lacZ*). The expression pattern is weaker in the mid third instar **(B)**. TOPRO3 (blue) stains nuclei.

**(C)** Control (*Antp-gal4 UAS-2xEGFP*).

**(D)** Pvf2 down-regulation in the PSC (*Antp-gal4 UAS-2xEGFP UAS-Pvf2<sup>RNAi</sup>*) does not cause loss of cells in MZ.

**(E)** Control (*dome-gal4 UAS-2xEGFP*). The progenitor population is confined to the medullary zone.

**(F-H)** Down-regulation of Pvf2 **(F)** (*dome-gal4 UAS-2xEGFP UAS-Pvf2<sup>RNAi</sup>*), Pvr **(G)** (*dome-gal4 UAS-2xEGFP UAS-Pvr<sup>RNAi</sup>*), and shg **(H)** (*dome-gal4 UAS-2xEGFP UAS-shg<sup>RNAi</sup>*) in the MZ has no effect on the differentiation status of hematopoietic progenitors (green), but causes spillage of these progenitors throughout the lymph gland lobe including the CZ.

(I) Control (*dome-gal4 UAS-2xEGFP*). Shg (*Drosophila* E-cadherin) expression is confined to the MZ.

(J) Down-regulation of Pvr in the MZ (*dome-gal4 UAS-2xEGFP UAS-Pvr<sup>RNAi</sup>*) reduces Shg expression (red).

### Figure S3. Pvr/STAT/Adgf-A function in the CZ

In panels C and D, the GFP channel (*Hml-gal4 UAS-2xEGFP*) is represented in red for the sake of consistency in marking differentiating hemocytes in all panels in red.

(A-B) Activated Pvr ( $Pvr^{act}$ : red) immunostaining. (A) Control lymph gland (*Antp-gal4 UAS-2xEGFP*) (B) Down-regulation of Pvf1 in the PSC (*Antp-gal4 UAS-2xEGFP UAS-Pvf1<sup>RNAi</sup>*) causes a decrease in  $Pvr^{act}$  (red) staining in the CZ (compare to A).

(C-D) Lack of Domeless function in the CZ. (C) Control lymph gland (*Hml-gal4 UAS-2xEGFP*). (D) Over-expression of *domeless* dominant negative in the CZ (*Hml-gal4 UAS-dome<sup>DN</sup>*) does not cause loss of progenitors.

(E-H'') STAT-GFP reporter expression in third instar lymph glands from different trans-heterozygous genetic backgrounds. (E-E'') Control lymph gland (*10x Stat92E-GFP/+*). (F-H'') STAT-GFP reporter (green) expression is reduced in (F-F'') *Pvr-/+; STAT-/+*

(10x *Stat92E-GFP Pvr<sup>C2195</sup>/+; Stat92E<sup>06346</sup>/+*), (**G-G'**) *STAT<sup>-/+</sup> Adgf-A<sup>-/+</sup>* (10x *Stat92E-GFP; Stat92E<sup>06346</sup>/+ Adgf-A<sup>karel</sup>/+*), and (**H-H'**) *Pvr<sup>-/+</sup>; Adgf-A<sup>-/+</sup>* (10x *Stat92E-GFP Pvr<sup>C2195</sup>/+; Adgf-A<sup>karel</sup>/+*) trans-heterozygous backgrounds.

(**J**) Quantification of transheterozygote phenotypes. In all transheterozygous genetic backgrounds, the size of the CZ as a proportion of the total size of the lymph gland is significantly increased from control [(cont=*Hml-gal4*, n=15), *Pvr<sup>C2195</sup>/+; Stat92E<sup>06346</sup>/+* (n=17), *Stat92E<sup>06346</sup>/+ Adgf-A<sup>karel</sup>/+* (n=13) and *Pvr<sup>C2195</sup>/+; Adgf-A<sup>karel</sup>/+* (n=22).]

#### **Figure S4. Adgf-A and AdoR function in the LG**

In all panels, except **C** and **M'**, green represents differentiating hemocytes. All lymph glands are from third instar, except panels **H-J'**, **N-O** which are all second instar.

(**A-C**) Expression of Hh in the PSC. (**A**) Control lymph gland (*Hml-gal4 UAS-2xEGFP*). (**B**) Down-regulation of Adgf-A in the CZ does not alter Hh expression (red; *Hml-gal4 UAS-2xEGFP UAS-Adgf-A<sup>RNAi</sup>*). (**C**) Adgf-A homozygous mutants (*Adgf-A<sup>karel/karel</sup>*) show intact expression of Hh (red) and Antennapedia (green) in the PSC.

(**D-E**) Reactive oxygen species (ROS) in progenitors. (**D**) Control lymph gland (*Hml-gal4 UAS-2xEGFP*) shows high levels of ROS (red) in the MZ. (**E**) Down-regulation of Adgf-A in the CZ (*Hml-gal4 UAS-2xEGFP UAS-Adgf-A<sup>RNAi</sup>*) shows no change in ROS levels in early lymph glands.

**(F-G)** Over-expression of Adgf-A. **(F)** Control lymph gland (*Hml-gal4 UAS-2xEGFP*)  
**(G)** Over-expression of Adgf-A in the CZ (*Hml-gal4 UAS-2xEGFP UAS-Adgf-A*) does not alter the progenitor population.

**(H-L)** Loss of AdoR rescues the Adgf-A differentiation phenotype. BrdU (red) incorporation assay marks proliferating cells in lymph glands from mid 2<sup>nd</sup> instar larvae.  
**(H and H')** Control (*Hml-gal4 UAS-2xEGFP*, 19±5 BrdU positive cells, n=4). **(I and I')** Down-regulation of Adgf-A in the CZ (*Hml-gal4 UAS-2xEGFP UAS-Adgf-A<sup>RNAi</sup>*, 35±15 BrdU positive cells, n=8) is rescued by single copy loss *AdoR* **(J and J')**; *Hml-gal4 UAS-2xEGFP UAS-Adgf-A<sup>RNAi</sup>; AdoR<sup>KGex/+</sup>*, 20±7 BrdU positive cells, n= 8, p=0.005). **(K-L)** Downregulation of Adgf-A in the CZ causes loss of progenitors (*Hml-gal4 UAS-2xEGFP UAS-Adgf-A<sup>RNAi</sup>*). **(L)** Single copy loss of AdoR rescues the *Adgf-A<sup>RNAi</sup>* differentiation phenotype (*Hml-gal4 UAS-2xEGFP UAS-Adgf-A<sup>RNAi</sup>; AdoR<sup>KGex/+</sup>*).

**(M-M')** PKA regulates Ptc levels in progenitors. A large FLP-out clone expressing a dominant negative form of PKA (green) shows increased Ptc (red) expression compared to wild-type levels (arrowhead). Note that the smaller region enclosed within the dotted white line is wild type for PKA.

**(N-O)** Down-regulation of PKA function in progenitors does not alter proliferation. **(N)** Control (*dome-gal4*) **(O)** Down-regulation of PKA function in progenitors in mid-second instar lymph glands (*dome-gal4 UAS-PKA<sup>EP2162</sup>*) does not alter the number of cells incorporating BrdU.

**(P)** Homozygous *rutabaga* mutants (*rut<sup>1</sup>*) have fewer differentiated hemocytes (green).

Compare to **F**.

**(Q-T)** Activated Ci staining in lymph glands. **(Q)** Control (*WT, w<sup>1118</sup>*) **(R)** *rutabaga* mutants (*rut<sup>1</sup>/rut<sup>1</sup>*) show an increase in levels of Ci<sup>act</sup> expression. **(S)** *Adgf-A* mutants (*Adgf-A<sup>karel</sup>/Adgf-A<sup>karel</sup>*) show a reduction in Ci<sup>act</sup> expression levels. **(T)** Single copy loss of PKA function in *Adgf-A* mutants rescues Ci<sup>act</sup> expression (*PKA<sup>EP</sup>/Cyo GFP; Adgf-A<sup>karel</sup>/Adgf-A<sup>karel</sup>*). Compare to **Q** and **S**.

## EXPERIMENTAL PROCEDURES

### *Drosophila stocks*

All the *RNAi* stocks were obtained from VDRC (Vienna) and NIG (Kyoto), *UAS-Pvr<sup>RNAi</sup>* (B. Shilo), *UAS-Pvr<sup>DN</sup>* (P. Rorth and D. Montell), *10xSTAT-GFP* and *UAS-STAT<sup>DN</sup>* (J. Darnell), JAK alleles (M. Zeidler), *Pvf2-lacZ* (M.A.Yoo), *UAS-PKA mC\** and *mR\** (J. Calderon), *UAS-G<sub>cat</sub>* (J.E. Hooper), *UAS-Stat92E<sup>act</sup>* and *UAS-dome<sup>DN</sup>* (E. Bach), *Adgf-A<sup>Karel</sup>*, *UAS-Adgf-A*, and *UAS-AdoR* (T. Dolezal), and *AdoR<sup>KGex</sup>* (*AdoR<sup>KG03964ex</sup>*; A. Sehgal). All Hop alleles, *hop<sup>M38</sup>* and *hop<sup>MSV1</sup>*, have been shown to block canonical JAK/STAT signaling as the *os<sup>l</sup>* small eye phenotype is further enhanced by hypomorphic alleles of JAK (Tsai and Sun, 2004).

### *Immunohistochemistry*

Antibodies: Rat  $\alpha$ Pvr and  $\alpha$ Pvf1 (B. Shilo), rabbit  $\alpha$ Hh (R. Holmgren), rabbit  $\alpha$ Rab11 (D. Ready), mouse  $\alpha$ Pvr<sup>act</sup> (P. Rorth), mouse  $\alpha$ BrdU (Sigma), rat  $\alpha$ Ci<sup>155</sup> (DHSB), mouse  $\alpha$ Pxn (J. Fessler), and mouse  $\alpha$ P1 (I. Ando).

For phagocytic assays, Fluorescent beads (FluoSpheres 0.1  $\mu$ m carboxylate-modified microsphere, Invitrogen, Carlsbad, USA) were injected into the posterior lateral region of third instar larvae. One hour post-injection lymph glands were dissected and processed for imaging.

## SUPPLEMENTARY REFERENCES

Tsai YC, Sun YH. Long-range effect of upd, a ligand for Jak/STAT pathway, on cell cycle in *Drosophila* eye development. *Genesis* 39(2):141-53



Supplemental Figure 1  
[Click here to download high resolution image](#)

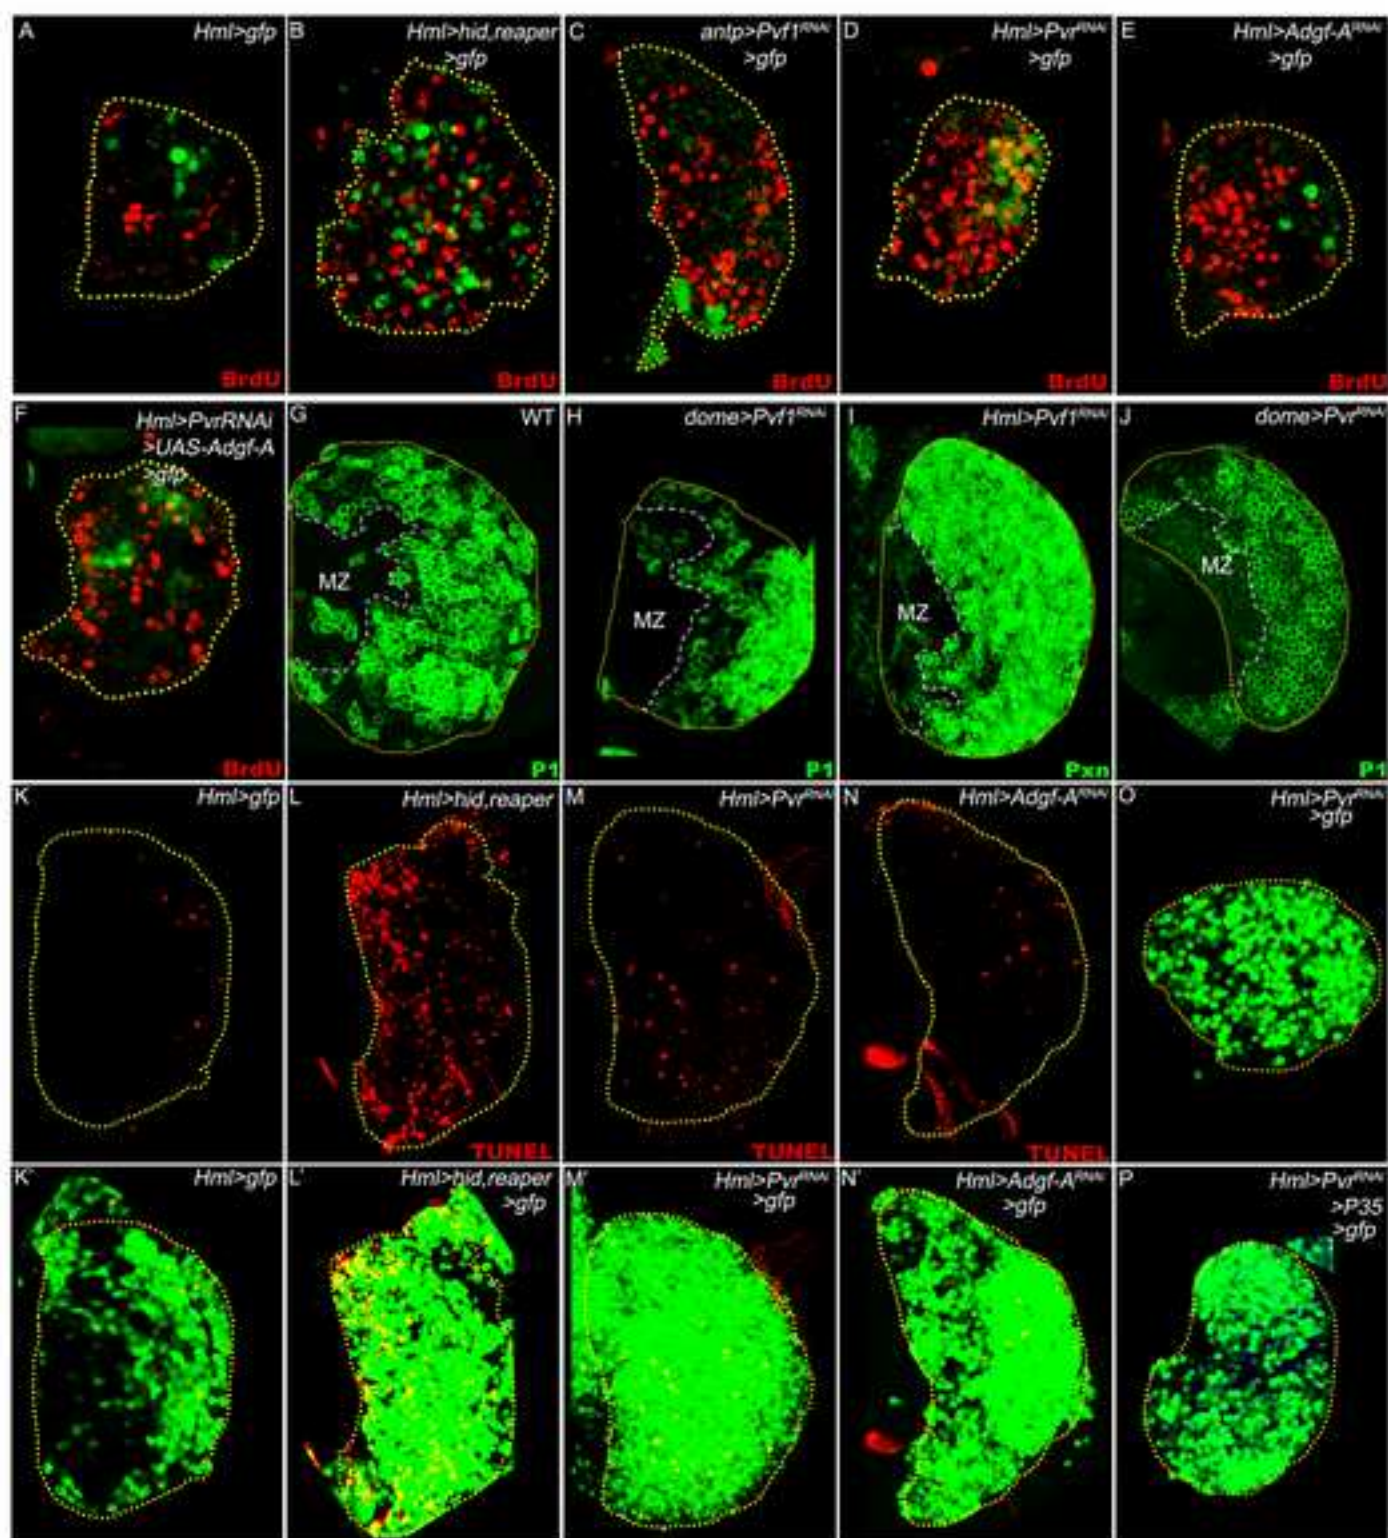

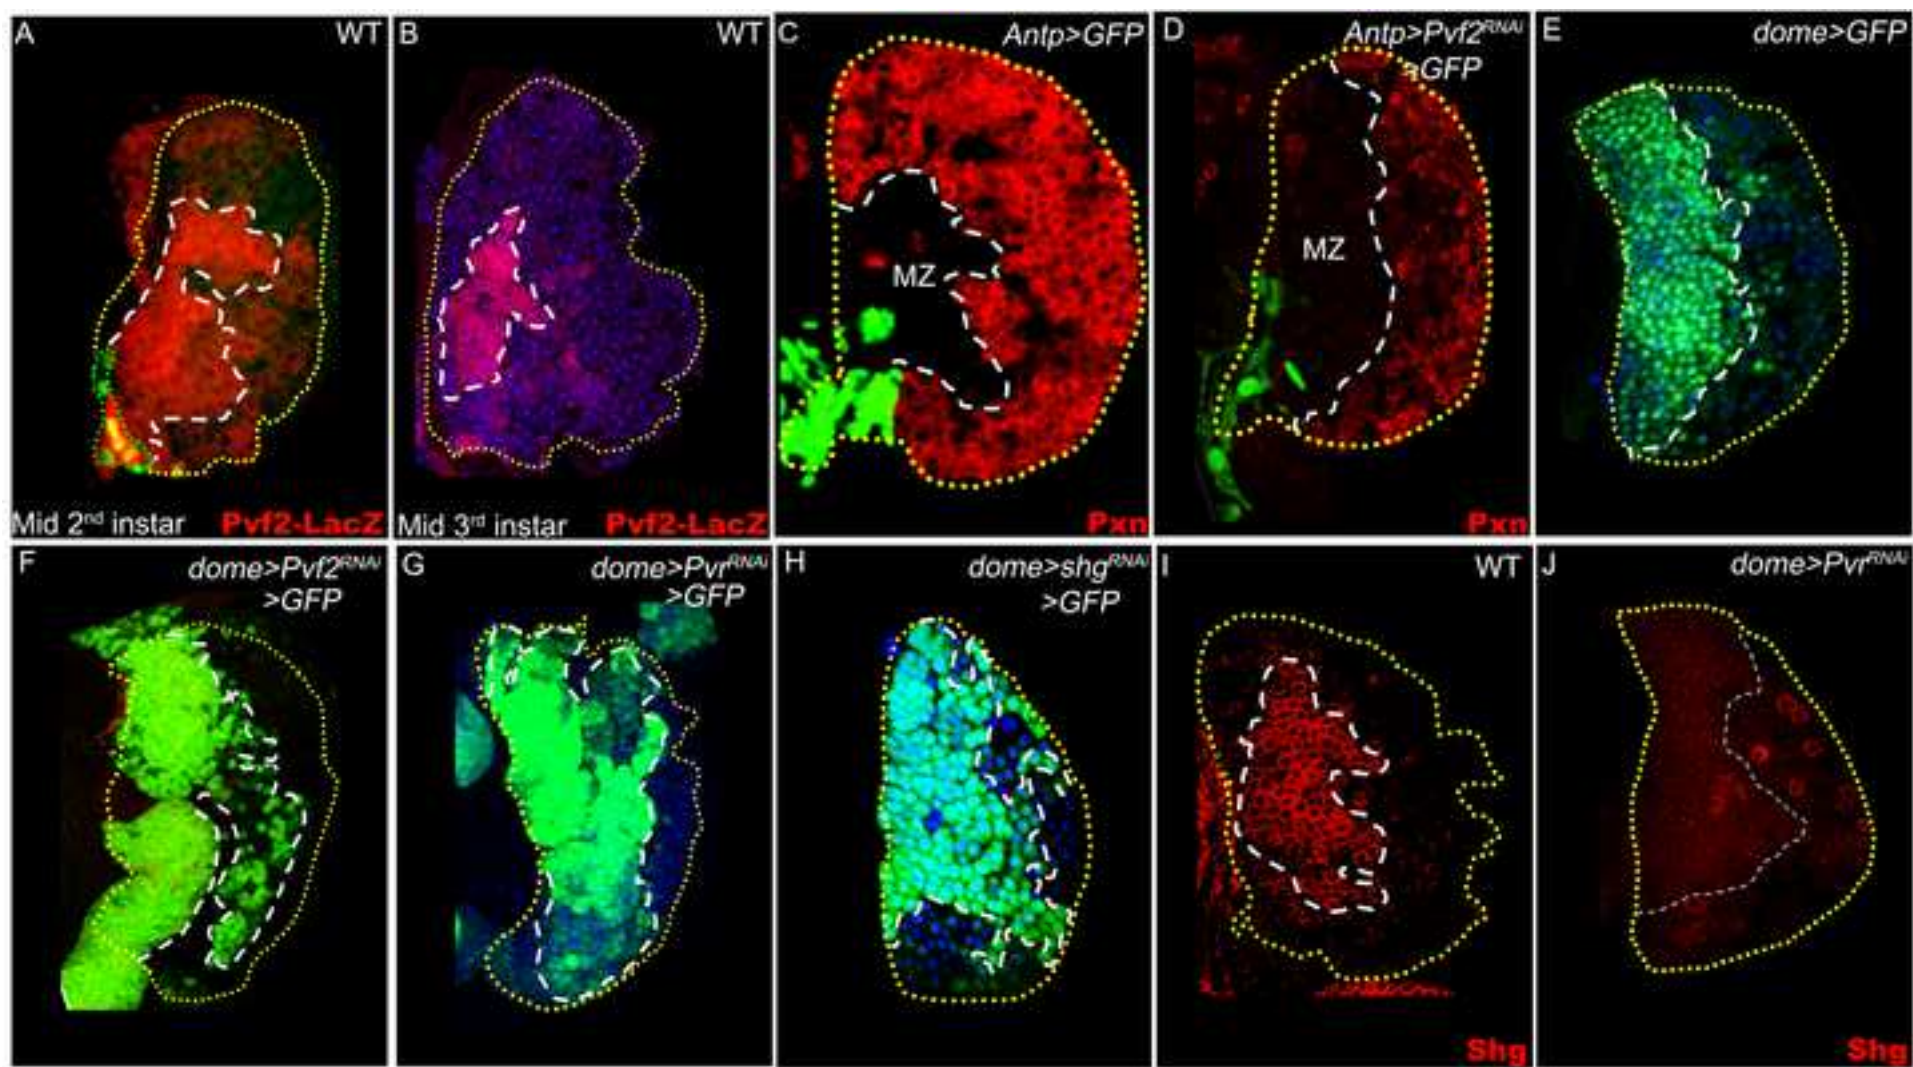



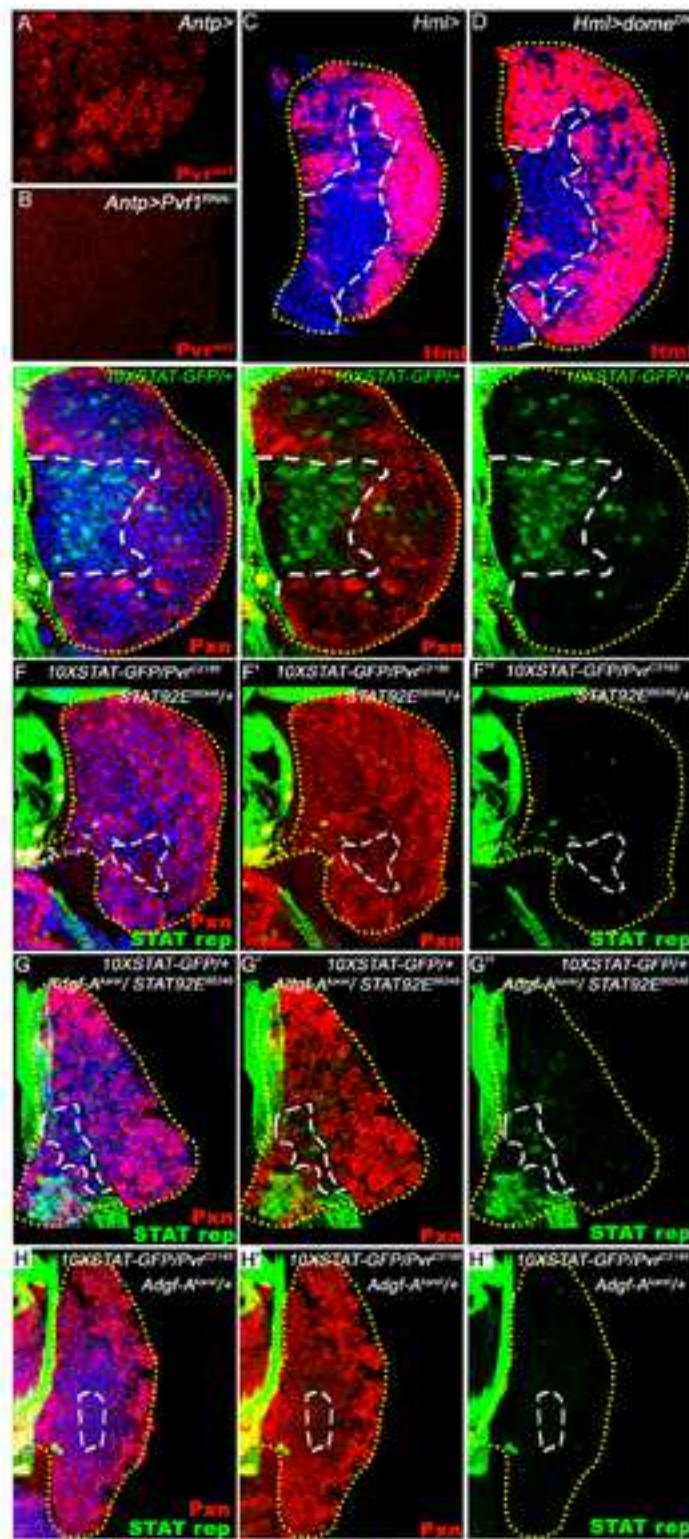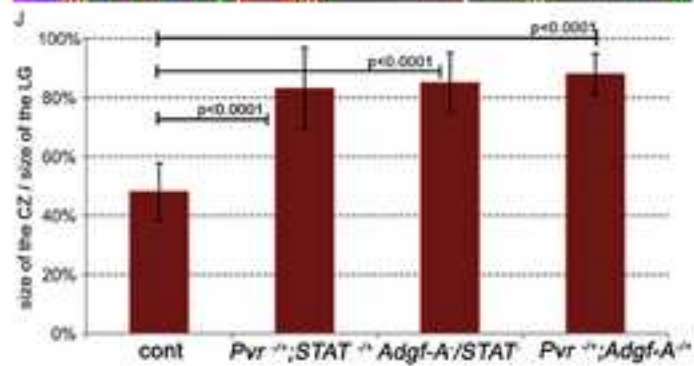



Supplemental Figure 4  
[Click here to download high resolution image](#)

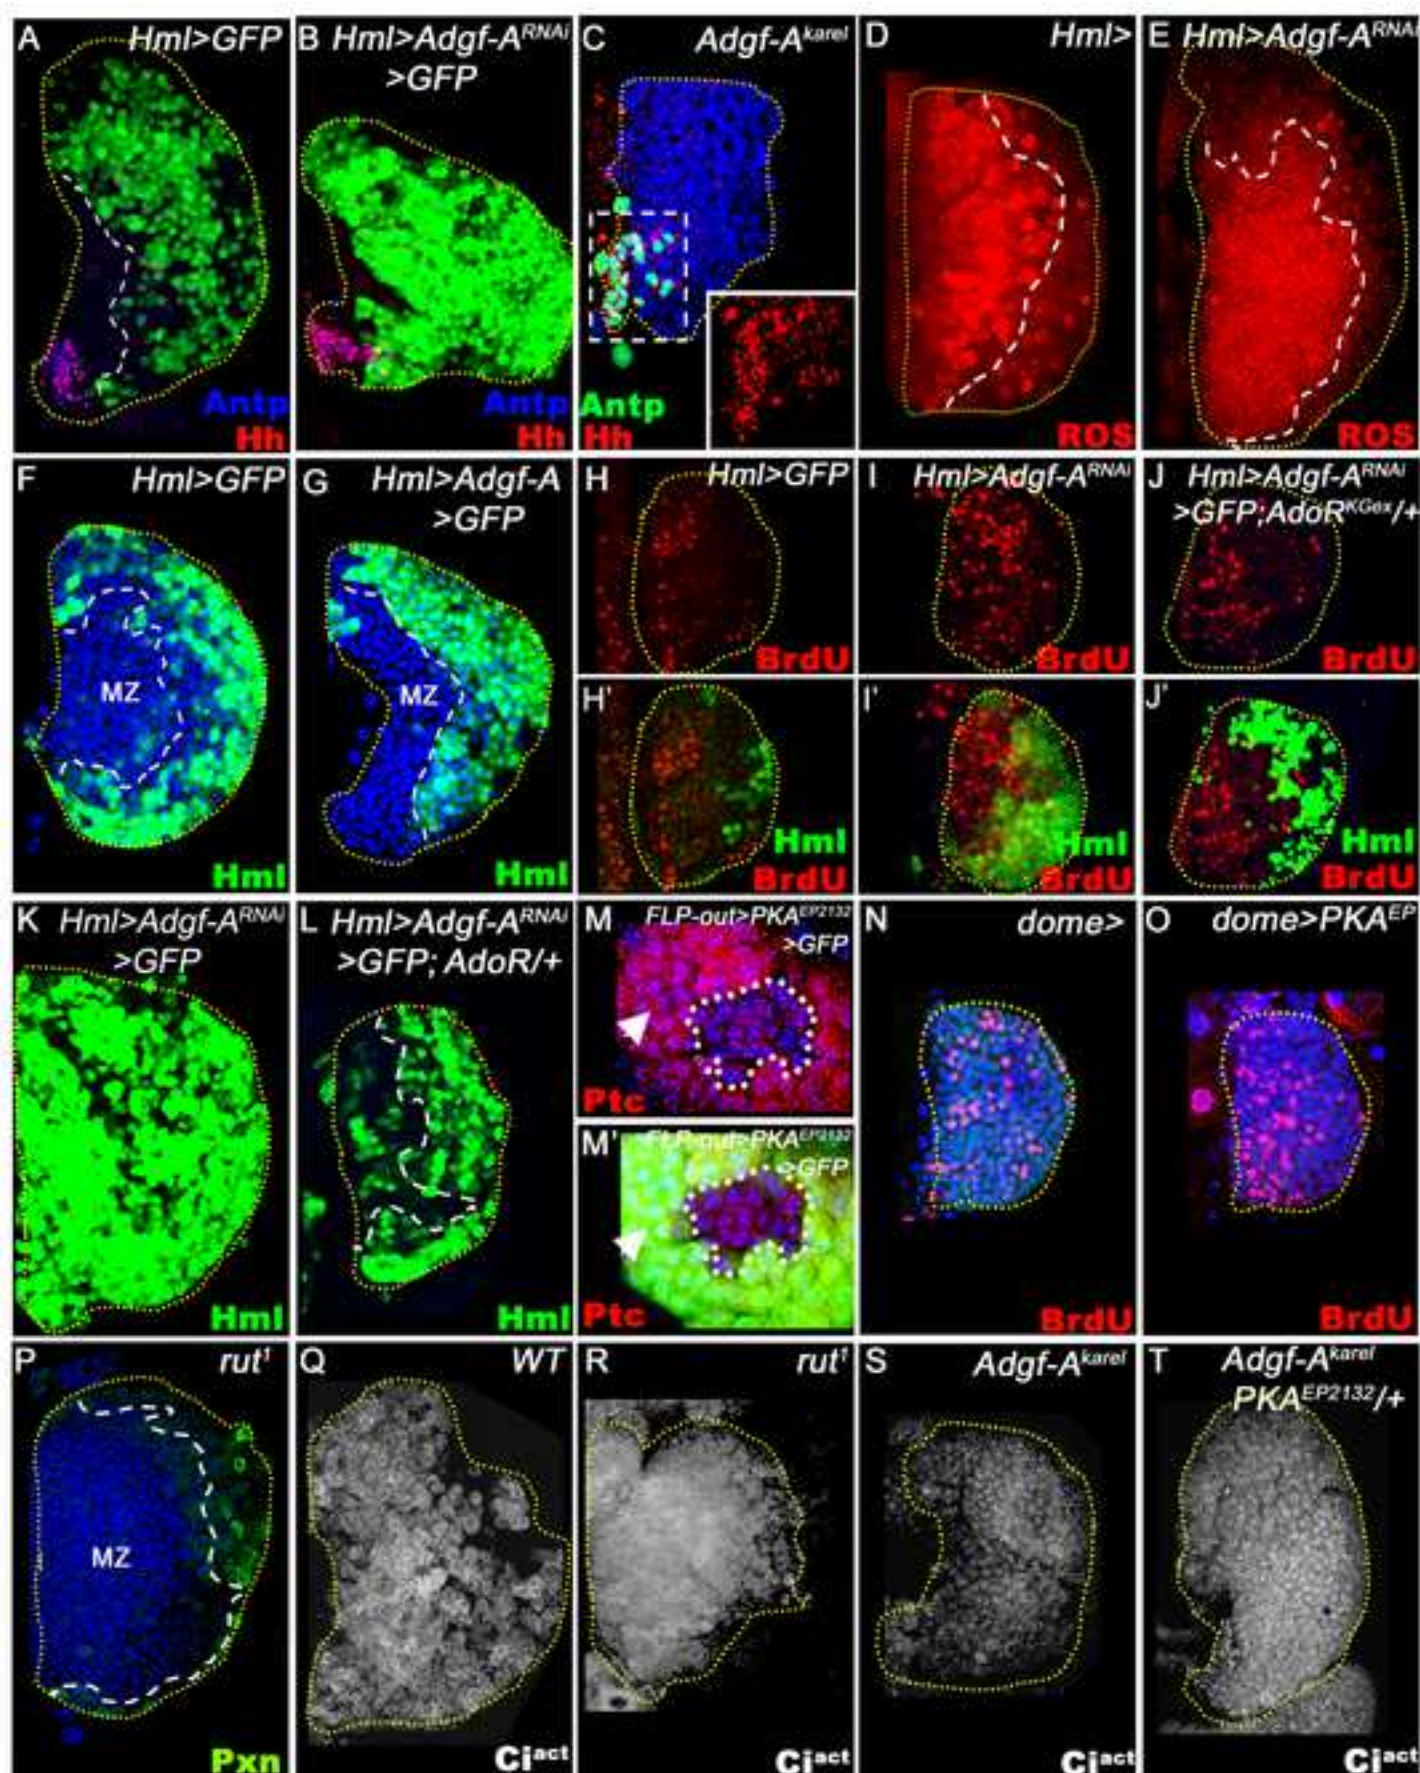

Supplement: NIHMS567057-supplement-Supplemental.pdf [file NIHMS567057-supplement-Supplemental.pdf]
